# Supplementary material for: Efficacy and Safety of Capecitabine for Triple-Negative Breast Cancer: A Meta-Analysis
Source: PubMed Central journal article supplement (PMC9300946; doi:10.3389/fonc.2022.899423), 2022-07-07

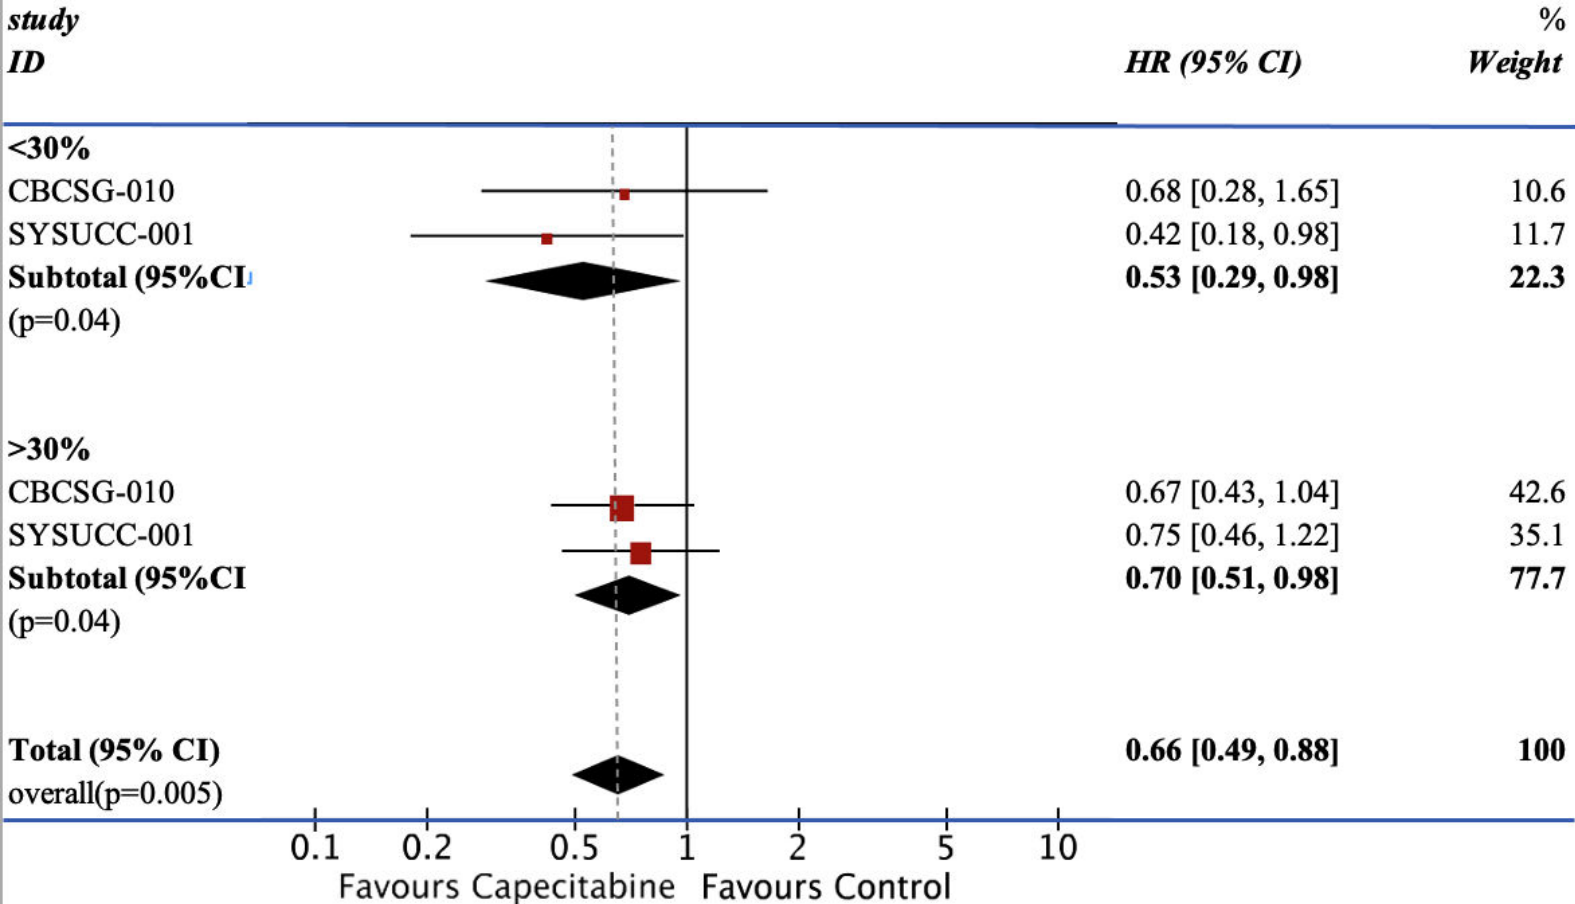

Supplement: DataSheet_4.pdf [file DataSheet_4.pdf]
